Gupta 1

**Does visitation dictate animal welfare in captivity? – A case study of tigers and leopards from National Zoological Park, New Delhi**

*Running title: Visitation effect on captive big cats*

Gupta Avni<sup>1#\*</sup>, Vashisth Saurabh<sup>2#</sup>, Sharma Mahima<sup>1</sup>, Singh Randeep<sup>1</sup>, Hore Upamanyu<sup>1</sup>, Lee Hang<sup>3</sup>,  
Pandey Puneet<sup>13\*</sup>

<sup>#</sup>Both authors have contributed equally to this work

<sup>1</sup>Amity Institute of Forestry and Wildlife, Amity University, Noida, Uttar Pradesh – 201301

<sup>2</sup>National Zoological Park, Mathura Road, New Delhi – 110003

<sup>3</sup>Conservation Genome Resource Bank for Korean Wildlife and Research Institute for Veterinary Science, Seoul National University College of Veterinary Medicine, 1 Gwanak-gu, Gwanak-ro, Seoul – 08826, South Korea

\*Corresponding authors: [avni2501gupta@gmail.com](mailto:avni2501gupta@gmail.com); [puneet.pandey09@gmail.com](mailto:puneet.pandey09@gmail.com)

Gupta 2

## **Abstract**

Zoological Parks serve a salient purpose of entertaining many visitors by housing various exclusive animal species. Big cats like tigers and leopard are among the most visited species in zoos globally. We investigated the behavioral response of the zoo-housed big cats to visitor densities and noise. We also aimed to understand the relationship between stereotypy, animal history, feeding schedules, and enclosure design. The behavior of eight big cats housed in the National Zoological Park, New Delhi, was monitored using the focal sampling technique during the May and June 2019 to construct the ethograms. We also recorded the visitor density, ambient noise, for the same duration. Both species were found devoting a significant amount (>50%) of time in displaying inactive behaviors. Tigers and leopards performed stereotypic behaviors for 22% and 28% of their time, respectively. Pearson chi-square analysis revealed a significant variation of stereotypy in association with biological (age, sex, and rearing history) and captive (enclosure design) variables. Big cats' stereotypic behaviors were found significantly influenced by the high visitor density. However, ambient noise did not impact the stereotypy of both the felid species. Visitors form an integral part of zoos, and their detrimental impact diminishes the well-being of captive animals. This study revealed that tigers and leopards in NZP display a high proportion of inactive and stereotypic behaviors. Thus, we suggest zoo authorities adopt more enclosure enrichment initiatives.

*Key words: ethogram, stereotypy, visitor effect, stress, felids*

## Gupta 3

### 1 **1. Introduction**

2 Zoos are a means to ensure the physical and mental well-being of captive animal populations that  
3 support the existing population in the wild. Optimal animal welfare fosters comfortability, safety,  
4 ability to express innate and natural behaviors, and prevents distress. However, any environmental  
5 stressor may lead to distortion in coping with the surroundings (Morgan & Tromborg, 2007). Reduced  
6 life expectancy, diminished growth, impaired reproduction, diseases, behavior anomalies, and body  
7 damage imply sub-optimal welfare (D. M. Broom, 1991). Captive conditions are vastly different from  
8 the wild environments in terms of spatial confinement, restrictions, simplicity, control, and  
9 predictability (Morgan & Tromborg, 2007). Captivity curbs animals to elicit the complex behavior  
10 repertoire that they have evolved over the years. Zoo-housed animals necessitate mechanisms to cope  
11 up with such monotonous surroundings (Mason, 1991). The display of various forms of stereotypic  
12 behaviors suggests stress and frustration in captive conditions. Caged animals often perform  
13 repetitive, abnormal behaviors such as pacing, coprophagy, overgrooming, and head-weaving (Lyons,  
14 Young, & Deag, 1997). Such behaviors are a method to pass the time and substitute free-ranging  
15 behavior as they have no apparent function or goal (Carlstead, 1998; Hediger, 1950; Odberg, 1978).  
16 Stereotypies are supposed to deviate an individual from a typical behavior repertoire by their evident  
17 lack of purpose and have claimed to represent efforts to subsist one with unpleasant environmental  
18 conditions (Dantzer, 1991; Swaisgood & Shepherdson, 2005). These atypical behaviors indicate the  
19 suboptimal level of an animal's psychological welfare (Boorer, 1972; Mason, 1991). Stereotypies may  
20 arise from a primary behavior pattern that caged species have eventually become motivated to  
21 perform (Holzapfel, 1939; Mason, Clubb, Latham, & Vickery, 2007).

22 Humans tend to leave an impact on their surrounding environment. Visitors are crucial to govern the  
23 animal welfare in captivity as they often induce alterations to behavior repertoire in captive species  
24 (Davey, 2007; Hosey, 2000). Public visiting zoological parks form relationships with captive species  
25 (Cole & Fraser, 2018). The "visitor effect" could be positive, neutral, or negative (Hosey, 2008;  
26 Hosey & Melfi, 2015). When human interactions benefit the caged animal and increase the animal's  
27 species-specific behavior, they foster positive and healthy relationships with animals (Baker, 2004;

## Gupta 4

28 Claxton, 2011). This results in a significant reduction in the time spent performing stereotypies and  
29 inducing natural or wild-type behaviors. There may also be certain conditions when animals become  
30 habituated to visitors due to consistent exposure and thereby exhibit no behavioral changes. On the  
31 other hand, the visitor's unfitting behaviors can result in an adverse effect of visitation. Activities such  
32 as shouting, teasing, throwing stones, hitting, and moving in unpredictable ways can impel fear and  
33 stress response in captive animals (Cole & Fraser, 2018; Venugopal & Sha, 1993). The mere presence  
34 of human visitors yields a significant impact on the behavior of various mammalian species in zoos  
35 (Hosey, 2000). Different visitor attributes, such as presence, density, activity, noise, and proximity,  
36 can influence captive individual's behavior and physiology (Brouček, 2014; Davey, 2005, 2007).  
37 Prevalence of stereotypy may intensify on the days of a large and noisy human audience (Dybowska,  
38 Gorecka, Grzegorzóka, Wiczorek, & Zlamal, 2008; Mallapur & Chellam, 2002; Vidal et al., 2016).

39 The activity pattern of an animal is an expression in response to the resources available in  
40 surroundings, and hence in zoos, animals display distinct behaviors as compared to those in the wild  
41 (Young, 2003). Behavior studies, in relation to the knowledge of species-specific behaviors in the  
42 wild, help to assess the welfare of zoo-housed animals (Keeling & Jensen, 2002). The behavior of  
43 animals reflects its first attempt to cope with sub-optimal environmental conditions and hence acts as  
44 an effective useful welfare indicator (Bashaw, Bloomsmith, Marr, & Maple, 2003; Dawkins, 1998).  
45 Studying the extent to which visitation and other captive factors influence captive specie's behavior is  
46 a non-invasive measure. It is pivotal for suggesting better management practices for upkeep and  
47 welfare.

48 National Zoological Park (NZN) is one of the prominent Indian zoos. It entertains a large number of  
49 visitors each year. During 2018-19, more than 2.7 million people paid a visit to the zoo (Annual  
50 Report 2018-19). Big cats like tigers (*Panthera tigris*) and leopards (*Panthera pardus*) form a center  
51 of attraction for the most public. Visitors are more attentive and spend a long time viewing the animal  
52 when they are active and display species-specific behaviors (Altman, 1998; Bitgood, Patterson, &  
53 Benefield, 1988; Fernandez, Tamborski, Pickens, & Timberlake, 2009; Margulis, Hoyos, &  
54 Anderson, 2003). The study intended to understand the extent of stereotypic behaviors in the activity

## Gupta 5

55 pattern of captive tigers and leopards housed at National Zoological Park, New Delhi. Additionally, it  
56 aimed to understand the relationship between visitation, ambient noise, and stereotypy.

57

## 58 **2. Methodology**

### 59 2.1. Study area and subjects

60 National Zoological Park, situated in India's capital, received the status with the idea of it being the  
61 model zoo for the entire country (Agnihotri, 2012). The large-category zoo spreads over 188.62 acres  
62 of land and houses about 100 species in a total of 72 enclosures. It boasts a distinguished history of  
63 successful breeding of various animals including, tiger, brow-antlered deer, Indian rhinoceros, and  
64 Asiatic lion (Agnihotri, 2012).

65 We studied a total of eight individually-housed subjects (Table 1). These included four individuals  
66 each of tiger (*Panthera tigris tigris*) and leopard (*Panthera pardus fusca*). Three of the tigers were  
67 white and one a normal variant. All three white tigers were housed in one enclosure with an arena area  
68 of 1445 sqm. The studied normal tiger was housed in an enclosure of about 858 sqm arena area. The  
69 leopards were housed in two adjacent enclosures with an arena area of about 158 sqm and 136 sqm. A  
70 pair of male and female was let out into adjacent on-exhibit enclosures together. The enclosures were  
71 enriched with logs, trees, vegetation, and water supply. Subjects studied were let out in the on-exhibit  
72 enclosure from 09:30 to 16:30 hours. The animals were fed with buffalo meat once a day in their night  
73 cells, except Fridays. Since no animals are released in the enclosure on Friday, the subjects were  
74 studied for six days a week.

### 75 2.2. Activity Budgeting

76 The study was conducted for 208 hours, during the summer months of May and June in 2019. A pilot  
77 study of three days helped to enlist all the behaviors performed by the two species (Supplementary  
78 Table 1). Each individual was observed for 6 hours 30 minutes per day, for 4 consecutive days. On  
79 Fridays, the animals are fasted and kept in off-exhibit cells; hence they were not studied. A focal  
80 animal behavioral sampling at 1-minute intervals was used to construct an ethogram of the big cats

## Gupta 6

81 (Altmann, 1974). The activities performed were classified into three categories - a) active, b) inactive,  
82 c) stereotypic, for comparison and analysis (Table 2). Active behaviors include activities like walking,  
83 eating, drinking, chewing, and playing. Activities like sleeping, sitting, and resting are classified  
84 under inactive behaviors. Stereotypic behaviors were performed in various forms, including pacing,  
85 skip-pacing, and tail or toe sucking. The behavior was considered pacing when animal covered three  
86 or more traverses of a definite path (Forthman & Bakeman, 1992). The enclosures were divided into  
87 different zones – middle, edges, and visitor areas. Zone utilized for each state of behavior by animals  
88 was also recorded.

### 89 2.3. Biological and Captive Factors

90 The history of all the studied individuals was obtained from Zoo Aquarium Animal Management  
91 Software (ZIMS). Aspects such as age, sex, birthplace, origin, time spent in captivity, and rearing  
92 history were recorded (Table 1). Age was classified as young/adult; sex as male/female; origin as  
93 wild-born/captive-born; and rearing history as bred/unbred. Association of these variables was  
94 evaluated with stereotypic levels of all tigers and leopards.

### 95 2.4. Visitation

96 Visitation and behavior data were collected simultaneously yet independently. Visitor aspects  
97 considered were – visitor density (crowd size) and ambient noise. Visitor density was calculated by  
98 counting the number of visitors standing at the visitor area around the enclosures. Ambient noise was  
99 measured in Decibels (dB), using digital noise meter (970P Meco Digital Sound Level Meter).

### 100 2.5. Statistical Analysis

101 Ethogram was constructed by calculating the frequency of each behavioral activity, converted to the  
102 proportion (or percentage) of time devoted to the particular behavior. Time spent in performing  
103 stereotypic and non-stereotypic behaviors was calculated. These were represented as strings of 0's and  
104 1's, where 1 denoted presence of stereotypy and 0 denoted absence of stereotypy. Data were recorded  
105 and analyzed in Microsoft Excel 2019. The average visitor density per minute and average ambient

## Gupta 7

106 noise per minute at the cage was calculated. The readings were found to deviate from a normal curve;  
107 hence, non-parametric tests were performed. Statistical analysis was made using the software IBM  
108 SPSS for Windows (Version 23). In all the tests,  $p$ -value ( $\alpha$ ) was defined at the value of 0.05 to  
109 establish statistical significance. Pearson's chi-square association test was performed to understand  
110 the relationship between animal history and stereotypic behaviors. Binary Logistic Regression model  
111 was performed to understand the effect of visitation (visitor density and ambient noise) on stereotypy.  
112 Visitation characteristics were considered as independent variables, while animal behavior was taken  
113 as the dependent variable.

114

### 115 3. Results

#### 116 3.1. Activity budgeting

117 The activity budget of tigers ( $n=4$ ) revealed that they devoted a significant amount of time displaying  
118 inactivity ( $49\pm 13\%$ ), of which, sitting was the most common ( $23\pm 6\%$ ) (Figure 1 and Table 2).  
119 Animals utilized the middle area and edges of enclosures for inactive behaviors. They devoted  $29\pm 8\%$   
120 of their time to active behaviors (Figure 1). Cooling was the most performed behavior ( $9\pm 4\%$ ),  
121 followed by walking ( $5\pm 2\%$ ). The middle, enriched zones of the enclosures were generally utilized for  
122 active behaviors. Tigers performed stereotypy for  $22\pm 11\%$  of their time. Pacing ( $22\pm 11\%$ ) and tail or  
123 toe sucking ( $0.1\%$ ), were the two forms of stereotypic behaviors. The pacing was predominantly  
124 performed toward the edges of the enclosure.

125 Like tigers, leopard subjects also devoted a considerable amount of time to inactive behaviors  
126 ( $55\pm 12\%$ , Figure 1). Sitting was the most common inactive behavior ( $41\pm 5\%$ , Table 2). The middle  
127 and rear areas of the enclosure were generally utilized for inactivity. They display active behaviors  
128 only for about  $17\pm 2\%$  of their time in on-exhibit enclosure. The highest amount of time was devoted  
129 to walking ( $6\pm 1\%$ ) of active behaviors (Table 2). Enriched zones of the enclosures were found to be  
130 utilized during the active periods. Leopards spent about  $28\pm 13\%$  of their time in displaying  
131 stereotypy. Unlike tigers, leopards display a more varied form of stereotypy, including pacing

## Gupta 8

132 (27±12%), skip-pacing (0.4%), and tail or toe-sucking (0.2%) (Table 2). They paced toward the edges  
133 and visitor zone of the enclosure.

### 134 3.2. Biological and Captive Factors

135 Chi-square test analysis indicated the difference in stereotypy among the two sexes (Table 3). Males  
136 exhibited high level of stereotypy (tiger=28±8%, leopard=38±1%) as compared to females  
137 (tiger=17±14%, leopard=18±7%). Analysis of stereotypy with respect to rearing history revealed a  
138 significant difference ( $\chi^2=39.51$ ;  $p<0.05$ ) in tigers as parents (n=3) displayed more stereotypic  
139 behaviors (28±5%) than unbred animals (7%). In both species, adults performed much more  
140 stereotypy in comparison to young (Table 3). However, the relationship between age and stereotypy  
141 was found significant only in tigers ( $\chi^2=30.14$ ;  $p<0.05$ ). Tigers housed in different enclosures did not  
142 reveal significant variation in stereotypic levels ( $\chi^2=0.07$ ;  $p>0.05$ ). Leopards housed in an enclosure  
143 with more viewing area (n=2) performed high levels of stereotypy (31±11%) in comparison to those  
144 housed in an enclosure with limited viewing area (25±17%). The relationship was statistically  
145 significant ( $\chi^2=36.58$ ;  $p<0.05$ ), suggesting the influence of enclosure type on the behavior repertoire.

### 146 3.3. Visitation Effect

147 The average density of the audience was found higher around tiger enclosures (31 humans/minute)  
148 compared to leopards (13 humans/minute). However, the average noise level remains almost the same  
149 around the enclosures of both species (tiger=64 dB and leopard=62 dB). Binary logistic regression  
150 model was able to distinguish between the effect of stereotypy and visitation on both species  
151 ( $\chi^2=4.17$  for tigers,  $\chi^2=8.14$  for leopards;  $df=1$ ;  $p<0.05$ ) (Table 4). The level of stereotypy gets  
152 increased when they are encountered with large crowds of audiences. However, the tiger and leopard  
153 behavior repertoire remained unaffected by the ambient noise as the relationship was non-significant  
154 ( $\chi^2=4.17$  for tigers;  $\chi^2=8.14$  for leopards;  $df=1$ ;  $p>0.05$ ) (Table 4).

155

## 156 4. Discussion



## Gupta 9

157 In response to any change in the environment, alteration of behavior repertoire reflects the first line of  
158 defense of an animal. High proportions of inactive behaviors found in the study align with various  
159 activity budgeting studies (Biolatti et al., 2016; Mallapur & Chellam, 2002; Pitsko, 2003; Sajjad,  
160 Farooq, Anwar, Khurshid, & Bukhari, 2011; Yu et al., 2009). Lack of enrichment elements and hiding  
161 refuges in captive conditions may cause excessive inactivity (Mallapur & Chellam, 2002). In this  
162 study, all subjects performed the stereotypical behaviors for 7% to 38% of the time in varying forms  
163 like pacing, skip-pacing, and tail or toe sucking (Figure 1 and Table 2). Stereotypic pacing is usually  
164 accompanied by consistent behavior of marking territory (Boorer, 1972). The high proportion of  
165 stereotypy amongst captive felids has been demonstrated in multiple studies (Bashaw et al., 2003;  
166 Biolatti et al., 2016; Clubb & Mason, 2007; De Rouck, Kitchener, Law, & Nelissen, 2005; Mallapur,  
167 Qureshi, & Chellam, 2002; Mohapatra, Panda, & Acharya, 2014; Sajjad et al., 2011). It has been  
168 suggested that the stereotypical level beyond 10% of the total activity is generally unacceptable for  
169 any captive animals (Broom, 1983). According to some study, an animal's welfare status is  
170 considered unacceptable if more than 5% of the studied population performs stereotypic behaviors  
171 (Mason, 1991; Wielebnowski, 2003). In predatory animals, stereotypies are generally locomotory in  
172 nature, which may result from their motivation to forage, range, seek mate, patrol territory, explore,  
173 and escape aversive situations (Clubb & Vickery, 2006). The significant pacing levels along enclosure  
174 edges were also reported by other studies involving various felid species (Lyons et al., 1997; Mallapur  
175 et al., 2002; Sajjad et al., 2011). Intensified pacing and restlessness coincided with feeding and when  
176 the food truck was audible or visible to the animals. Bouts of stereotypy also overlapped with the  
177 presence of animal keepers around the housing exhibits. Numerous studies on big cats made identical  
178 observations (Mohapatra, Mishra, Parida, & Mishra, 2010; Mohapatra et al., 2014; Palita, 1997). The  
179 high stereotypies displayed by the two species could be induced by the predictable feeding regime and  
180 simplified food provisioning technique. Modification of food, such as hiding it or an unpredictable  
181 schedule, can enhance the targeted animal welfare (Shepherdson, Carlstead, Mellen, & Seidensticker,  
182 1993; Watters, Miller, & Sullivan, 2011). Display of stereotypies implies suboptimal welfare in  
183 captive conditions as it conveys a warning sign of potential suffering.

## Gupta 10

184 This study suggested the increased display of stereotypic behavior in males compare to female  
185 conspecifics. Few other studies have reported similar influence of sex on stereotypy in case of captive  
186 felids (Dybowska et al., 2008; Vaz et al., 2017). Due to the male big cat's larger territory size in the  
187 wild, the male individuals may experience more spatial stress in enclosed spaces. Tigers bred in  
188 captivity exhibited more stereotypy. Similar findings were also reported in another study (Vaz et al.,  
189 2017). Adult tigers showed more stereotypic behaviors than young counterparts, as recorded in other  
190 studies (Breton & Barrot, 2014; Vaz et al., 2017). This is supported by the notion that stereotypies  
191 develop when felids become old enough to disperse from their natal home range and further intensify  
192 with age (Mohapatra et al., 2014; Smith, 1993). As animal ages and body enlarges, it experiences  
193 spatial constraints in captive conditions, causing behavioral repertoire alterations.

194 Visitor presence, the noise produced, visitor proximity and behavior, are known to influence captive  
195 specie's behavior repertoire (Hosey & Druck, 1987). Human activities such as shouting, teasing,  
196 banging barriers, and throwing stones at the animals may cause psychological and physical harm to  
197 the victim animal (Venugopal & Sha, 1993). Visitor effect could induce stress in zoo animals, which  
198 may ultimately contribute to the appearance of pathologies and failure of captive breeding programs  
199 (Carder & Semple, 2008; Chamove, Hosey, & Schaetzel, 1988; Hosey & Druck, 1987). The study  
200 revealed the negative impact of visitor crowd size on the behavior repertoire of tigers and leopards. A  
201 large audience crowd has shown to influence stereotypy of captive felid species in various studies  
202 (Quadros, Goulart, Passos, Vecci, & Young, 2014; Sellinger & Ha, 2005; Vidal et al., 2016).  
203 Leopards housed in enclosures with larger viewing area performed high levels of stereotypic  
204 behaviors, thus supporting the effect of visitation on big cats in captivity. Bouts of stereotypy due to  
205 visitors presence suggest the animal's motivation to express flight behavior, but unable to perform the  
206 desired behavior (Dembiec, Snider, & Zanella, 2004).

207 One of the primary purposes of zoological parks is to impart knowledge and the idea of conservation  
208 amongst the public. Zoos need to attract visitors and communicate a strong message of conservation  
209 to achieve this. Visitor attraction hypothesis suggests that active animals engage visitors more  
210 efficiently, while inactive and stereotypic behaviors performed by animals are perceived as boredom

211 and stress by the visitors (Hosey, 2000). Therefore, it is crucial to alleviate the sub-optimal captive  
212 conditions that promote stereotypic behaviors amongst big cats. The provision of enrichment  
213 techniques is a mean to reduce levels of stereotypy and inactivity in captive felines (Mallapur et al.,  
214 2002; Powell, 1995; Skibieli, Trevino, & Naugher, 2007). Provision of cardboard box and toys, hiding  
215 refuges, elevated platforms, and olfactory enrichment are few recommended enrichment techniques to  
216 ensure optimal welfare (Bashaw et al., 2003; Damasceno et al., 2017; Jenny & Schmid, 2002;  
217 Markowitz & LaForse, 1987; McPhee, 2002; Mellen & Shepherdson, 1997; Mohapatra et al., 2010).  
218 Such techniques aid to encourage feeding, exploration, and interaction by eliciting species-specific  
219 behaviors. Moreover, the installation of appropriate visual barriers between caged animals and visitors  
220 is also an efficient measure to reduce the prevalence of stereotypic behaviors (Blaney & Wells, 2004).

221

## 222 **5. Conclusion and Recommendations**

223 This study suggests that the stereotypic behaviors were prevalent amongst tigers and leopards at  
224 National Zoological Park, New Delhi. The levels of stereotypy differed for the biological and captive  
225 factors of the big cats. Male, adult, and previously bred individuals exhibited the lengthened pacing  
226 periods compared to female and young individuals. Stereotypic behaviors performed by captive tigers  
227 and leopards were significantly impacted due to visitation. Large audience size led to an increase in  
228 the proportion of time spent in performing stereotypy. Thus, we recommend the installation of visual  
229 barriers to minimize the viewing area. Although enclosures at NZP follow the norms laid by the  
230 Central Zoo Authority, providing enrichment may possibly reduce the stereotypical behaviors and  
231 enhance the captive specie's welfare. Enrichment elements such as hidden spots and refuges, which  
232 mimic the wild, may promote the animals to exhibit more exploratory behaviors.

233

## 234 **Conflict of Interest**

235 The authors declare that they have no conflict of interests.

236

237 **Ethics approval**

238 The study involves no animal capture and handling and thus does not require any animal ethics  
239 committee permission. However, the necessary permission was obtained from concerned authorities  
240 to conduct the study. The subjects were monitored from a distant place without disturbing their  
241 natural behavior.

242 **Acknowledgments**

243 The authorities of the Amity Institute of Forestry and Wildlife, Amity University, and National  
244 Zoological Park, New Delhi, are acknowledged for their administrative support and permission to  
245 carry out the research work. We wish to thank the zoo staff of National Zoological Park for their  
246 assistance during the field study. The study is partially supported by the Bio-bridge Initiative (2019-  
247 20) research grant of the Secretariat of the Convention on Biological Diversity and Ministry of  
248 Environment of the Republic of Korea.

249 **Author contribution**

250 AG and PP conceived and designed experiments. RS, UH, and HL improvised the experiment design  
251 and assisted in data analysis. AG, SV, and MS collected the data. AG analysed data and wrote the  
252 manuscript. All authors read and approved the final version of manuscript.

253

254 **References**

- 255 Agnihotri, A. (2012). *Master Plan (2012-31) National Zoological Park, New Delhi*. New Delhi, India
- 256 Altman, J. D. (1998). Animal activity and visitor learning at the zoo. *Anthrozoös*, *11*(1), 12-21.
- 257 Altmann, J. (1974). Observational study of behavior: sampling methods. *Behaviour*, *49*(3-4), 227-266.
- 258 Baker, K. C. (2004). Benefits of positive human interaction for socially-housed chimpanzees. *Animal*
- 259 *welfare (South Mimms, England)*, *13*(2), 239.
- 260 Bashaw, M. J., Bloomsmith, M. A., Marr, M., & Maple, T. L. (2003). To hunt or not to hunt? A
- 261 feeding enrichment experiment with captive large felids. *Zoo Biology: Published in affiliation*
- 262 *with the American Zoo and Aquarium Association*, *22*(2), 189-198.
- 263 Biolatti, C., Modesto, P., Dezzutto, D., Pera, F., Tarantola, M., Gennero, M., . . . Acutis, P. (2016).
- 264 Behavioural analysis of captive tigers (*Panthera tigris*) under different zoo managements.
- 265 *Appl. Anim. Behav. Sci.*, *174*, 173-180.
- 266 Bitgood, S., Patterson, D., & Benefield, A. (1988). Exhibit design and visitor behavior: Empirical
- 267 relationships. *Environment and behavior*, *20*(4), 474-491.
- 268 Blaney, E., & Wells, D. (2004). The influence of a camouflage net barrier on the behaviour, welfare
- 269 and public perceptions of zoo-housed gorillas. *Animal Welfare*, *13*(2), 111-118.
- 270 Boorer, M. K. (1972). Some aspects of stereotyped patterns of movement exhibited by zoo animals.
- 271 *International Zoo Yearbook*, *12*(1), 164-168.
- 272 Breton, G., & Barrot, S. (2014). Influence of enclosure size on the distances covered and paced by
- 273 captive tigers (*Panthera tigris*). *Applied Animal Behaviour Science*, *154*, 66-75.
- 274 Broom. (1983). Stereotypies as animal welfare indicators. In *Indicators relevant to farm animal*
- 275 *welfare* (pp. 81-87): Springer.
- 276 Broom, D. M. (1991). Animal welfare: concepts and measurement. *Journal of Animal Science*,
- 277 *69*(10), 4167-4175.
- 278 Brouček, J. (2014). Effect of noise on performance, stress, and behaviour of animals. *Slovak journal*
- 279 *of animal science*, *47*(2), 111-123.

- 280 Carder, G., & Semple, S. (2008). Visitor effects on anxiety in two captive groups of western lowland  
281 gorillas. *Applied Animal Behaviour Science*, *115*(3-4), 211-220.
- 282 Carlstead, K. (1998). Determining the causes of stereotypic behaviors in zoo carnivores: toward  
283 appropriate enrichment strategies. *Second nature: Environmental enrichment for captive*  
284 *animals*, 172-183.
- 285 Chamove, A. S., Hosey, G. R., & Schaetzel, P. (1988). Visitors excite primates in zoos. *Zoo Biology*,  
286 *7*(4), 359-369.
- 287 Claxton, A. M. (2011). The potential of the human–animal relationship as an environmental  
288 enrichment for the welfare of zoo-housed animals. *Applied Animal Behaviour Science*, *133*(1-  
289 2), 1-10.
- 290 Clubb, R., & Mason, G. J. (2007). Natural behavioural biology as a risk factor in carnivore welfare:  
291 How analysing species differences could help zoos improve enclosures. *Applied Animal*  
292 *Behaviour Science*, *102*(3-4), 303-328.
- 293 Clubb, R., & Vickery, S. (2006). Locomotory stereotypies in carnivores: does pacing stem from  
294 hunting, ranging, or frustrated escape. *Stereotypic animal behaviour: fundamentals and*  
295 *applications to welfare*, *2*, 58-79.
- 296 Cole, J., & Fraser, D. (2018). Zoo Animal Welfare: The Human Dimension. *Journal of Applied*  
297 *Animal Welfare Science*, *21*(sup1), 49-58.
- 298 Damasceno, J., Genaro, G., Quirke, T., McCarthy, S., McKeown, S., & O'Riordan, R. (2017). The  
299 effects of intrinsic enrichment on captive felids. *Zoo Biology*, *36*(3), 186-192.
- 300 Dantzer, R. (1991). Stress, stereotypies and welfare. *Behavioural processes*, *25*(2-3), 95-102.
- 301 Davey, G. (2005). The 'visitor effect'. *Zoos' Print Journal*, *20*(6), 1900-1903.
- 302 Davey, G. (2007). Visitors' effects on the welfare of animals in the zoo: A review. *Journal of Applied*  
303 *Animal Welfare Science*, *10*(2), 169-183.
- 304 Dawkins, M. S. (1998). Evolution and animal welfare. *The Quarterly Review of Biology*, *73*(3), 305-  
305 328.

- 306 De Rouck, M., Kitchener, A., Law, G., & Nelissen, M. (2005). A comparative study of the influence  
307 of social housing conditions on the behaviour of captive tigers (*Panthera tigris*). *Animal*  
308 *Welfare - Potters bar then Wheathampstead* -, 14(3), 229.
- 309 Dembiec, D. P., Snider, R. J., & Zanella, A. J. (2004). The effects of transport stress on tiger  
310 physiology and behavior. *Zoo Biology: Published in affiliation with the American Zoo and*  
311 *Aquarium Association*, 23(4), 335-346.
- 312 Dybowska, J., Gorecka, J., Grzegorzówka, B., Wieczorek, M., & Zlamal, A. (2008). Analysis of the  
313 influence of environmental enrichment on the behaviour of wild cats kept in captivity. *Annals*  
314 *of Warsaw University of Life Sciences-SGGW, Animal Science*, 45, 3-17.
- 315 Fernandez, E. J., Tamborski, M. A., Pickens, S. R., & Timberlake, W. (2009). Animal–visitor  
316 interactions in the modern zoo: Conflicts and interventions. *Applied Animal Behaviour*  
317 *Science*, 120(1-2), 1-8.
- 318 Forthman, D. L., & Bakeman, R. (1992). Environmental and social influences on enclosure use and  
319 activity patterns of captive sloth bears (*Ursus ursinus*). *Zoo Biology*, 11(6), 405-415.
- 320 Hediger, H. (Ed.) (1950). *WILD ANIMALS IN CAPTIVITY*. London: BUTTERWORTHS  
321 SCIENTIFIC PUBLICATIONS.
- 322 Holzapfel, M. (1939). Die Entstehung einiger Bewegungsstereotypen bei gehaltenen Säugern und  
323 Vögeln. *Revue Suisse Zoologie*, 46, 567-580.
- 324 Hosey. (2000). Zoo animals and their human audiences: what is the visitor effect? *Animal Welfare*,  
325 9(4), 343-357.
- 326 Hosey. (2008). A preliminary model of human–animal relationships in the zoo. *Applied Animal*  
327 *Behaviour Science*, 109(2-4), 105-127.
- 328 Hosey, & Druck, P. L. (1987). The influence of zoo visitors on the behaviour of captive primates.  
329 *Applied Animal Behaviour Science*, 18(1), 19-29.
- 330 Hosey, & Melfi. (2015). Are we ignoring neutral and negative human–animal relationships in zoos?  
331 *Zoo Biology*, 34(1), 1-8.

Gupta 16

- 332 Jenny, S., & Schmid, H. (2002). Effect of feeding boxes on the behavior of stereotyping Amur tigers  
333 (*Panthera tigris altaica*) in the Zurich Zoo, Zurich, Switzerland. *Zoo Biology: Published in*  
334 *affiliation with the American Zoo and Aquarium Association, 21*(6), 573-584.
- 335 Keeling, L., & Jensen, P. (2002). Behavioural disturbances, stress and welfare. In P. Jensen (Ed.), *The*  
336 *ethology of domestic animals: an introductory text* (pp. 79-98): CABI Publishing.
- 337 Lyons, J., Young, R. J., & Deag, J. M. (1997). The effects of physical characteristics of the  
338 environment and feeding regime on the behavior of captive felids. *Zoo Biology: Published in*  
339 *affiliation with the American Zoo and Aquarium Association, 16*(1), 71-83.
- 340 Mallapur, A., & Chellam, R. (2002). Environmental influences on stereotypy and the activity budget  
341 of Indian leopards (*Panthera pardus*) in four zoos in Southern India. *Zoo Biology: Published*  
342 *in affiliation with the American Zoo and Aquarium Association, 21*(6), 585-595.
- 343 Mallapur, A., Qureshi, Q., & Chellam, R. (2002). Enclosure design and space utilization by Indian  
344 leopards (*Panthera pardus*) in four zoos in southern India. *Journal of Applied Animal Welfare*  
345 *Science, 5*(2), 111-124.
- 346 Margulis, S. W., Hoyos, C., & Anderson, M. (2003). Effect of felid activity on zoo visitor interest.  
347 *Zoo Biology: Published in affiliation with the American Zoo and Aquarium Association,*  
348 *22*(6), 587-599.
- 349 Markowitz, H., & LaForse, S. (1987). Artificial prey as behavioral enrichment devices for felines.  
350 *Applied Animal Behaviour Science, 18*(1), 31-43.
- 351 Mason, G. (1991). Stereotypies and suffering. *Behavioural processes, 25*(2-3), 103-115.
- 352 Mason, G., Clubb, R., Latham, N., & Vickery, S. (2007). Why and how should we use environmental  
353 enrichment to tackle stereotypic behaviour? *Applied Animal Behaviour Science, 102*(3-4),  
354 163-188.
- 355 McPhee, M. E. (2002). Intact carcasses as enrichment for large felids: Effects on on- and off-exhibit  
356 behaviors. *Zoo Biology: Published in affiliation with the American Zoo and Aquarium*  
357 *Association, 21*(1), 37-47.
- 358 Mellen, J. D., & Shepherdson, D. J. (1997). Environmental enrichment for felids: an integrated  
359 approach. *International Zoo Yearbook, 35*(1), 191-197.



Gupta 17

- 360 Mohapatra, Mishra, A. K., Parida, S. P., & Mishra, S. (2010). *Behavioural responses to*  
361 *environmental enrichment in captive tigers (Panthera tigris) at Nandankanan Zoological*  
362 *Park, Orissa*. Retrieved from
- 363 Mohapatra, Panda, S., & Acharya, U. (2014). Study on activity pattern and incidence of stereotypic  
364 behavior in captive tigers. *Journal of Veterinary Behavior*, 9(4), 172-176.
- 365 Morgan, K. N., & Tromborg, C. T. (2007). Sources of stress in captivity. *Applied Animal Behaviour*  
366 *Science*, 102(3-4), 262-302.
- 367 Odberg, F. (1978). *Abnormal behaviours: stereotypies*. Paper presented at the Proceedings of the first  
368 world congress on ethology applied to zootechnics, Madrid.
- 369 Palita, S. K. (1997). Biological studies of the white tiger *Panthera Tigris* linn with special reference to  
370 Nandankanan biological park Orissa India.
- 371 Pitsko, L. E. (2003). *Wild tigers in captivity: a study of the effects of the captive environment on tiger*  
372 *behavior*. Virginia Tech,
- 373 Powell, D. (1995). Preliminary evaluation of environmental enrichment techniques for African lions.  
374 *Animal Welfare*, 4, 361-370.
- 375 Quadros, S., Goulart, V. D., Passos, L., Vecci, M. A., & Young, R. J. (2014). Zoo visitor effect on  
376 mammal behaviour: Does noise matter? *Applied Animal Behaviour Science*, 156, 78-84.
- 377 Sajjad, S., Farooq, U., Anwar, M., Khurshid, A., & Bukhari, S. (2011). Effect of captive environment  
378 on plasma cortisol level and behavioral pattern of Bengal tigers (*Panthera tigris tigris*).  
379 *Pakistan Veterinary Journal*, 31(3), 195-198.
- 380 Sellinger, R. L., & Ha, J. C. (2005). The effects of visitor density and intensity on the behavior of two  
381 captive jaguars (*Panthera onca*). *Journal of Applied Animal Welfare Science*, 8(4), 233-244.
- 382 Shepherdson, D. J., Carlstead, K., Mellen, J. D., & Seidensticker, J. (1993). The influence of food  
383 presentation on the behavior of small cats in confined environments. *Zoo Biology*, 12(2), 203-  
384 216.
- 385 Skibieli, A. L., Trevino, H. S., & Naugher, K. (2007). Comparison of several types of enrichment for  
386 captive felids. *Zoo Biology: Published in affiliation with the American Zoo and Aquarium*  
387 *Association*, 26(5), 371-381.

Gupta 18

- 388 Smith, J. L. D. (1993). The role of dispersal in structuring the Chitwan tiger population. *Behaviour*,  
389 *124*(3-4), 165-195.
- 390 Swaisgood, R. R., & Shepherdson, D. J. (2005). Scientific approaches to enrichment and stereotypies  
391 in zoo animals: what's been done and where should we go next? *Zoo Biology: Published in*  
392 *affiliation with the American Zoo and Aquarium Association*, *24*(6), 499-518.
- 393 Vaz, J., Narayan, E. J., Kumar, R. D., Thenmozhi, K., Thiyagesan, K., & Baskaran, N. (2017).  
394 Prevalence and determinants of stereotypic behaviours and physiological stress among tigers  
395 and leopards in Indian zoos. *PloS one*, *12*(4), e0174711.
- 396 Venugopal, B., & Sha, A. (1993). Visitor behaviour at lion-tailed macaque in the Mysor zoos. *Zoos*  
397 *Print Journal*, *8*, 45-48.
- 398 Vidal, L., Guilherme, F., Silva, V., Faccio, M., Martins, M., & Briani, D. (2016). The effect of visitor  
399 number and spice provisioning in pacing expression by jaguars evaluated through a case  
400 study. *Brazilian Journal of Biology*, *76*(2), 506-510.
- 401 Watters, J. V., Miller, J. T., & Sullivan, T. J. (2011). Note on optimizing environmental enrichment:  
402 A study of fennec fox and zoo guests. *Zoo Biology*, *30*(6), 647-654.
- 403 Wielebnowski, N. (2003). Stress and distress: evaluating their impact for the well-being of zoo  
404 animals. *Journal of the American Veterinary Medical Association*, *223*(7), 973-977.
- 405 Young, R. (2003). Environmental Enrichment for Captive Animals. Black. In: well Publishing,  
406 Oxford, UK.
- 407 Yu, S., Jiang, Z., Zhu, H., Li, C., Zhang, E., Zhang, J., & Harrington, C. (2009). Effects of odors on  
408 behaviors of captive Amur leopards *Panthera pardus orientalis*. *Current Zoology*, *55*(1), 20-  
409 27.
- 410

411 **Figure Legend**

412 Figure 1. Proportion of time spent by each subject of tigers and leopards in performing  
413 behaviors – a) inactive, b) active, c) stereotypic

414 **Table Legends**

415 Table 1. Subjects studied and their history (ZIMS)

416 Table 2. Percent of time spent in displaying different behaviors by tigers & leopards at NZP

417 Table 3. Pearson’s Chi-Square analysis to identify association of stereotypic behaviors displayed by  
418 captive tigers and leopards with biological variables (sex, rearing history, and age) and captive  
419 variable (enclosure design) at NZP

420 Table 4. Binary logistic regression to understand visitation effect on tigers and leopards at NZP

421

422

423

424

425

426

427

428

429

430

431

432

433 **Fig 1**

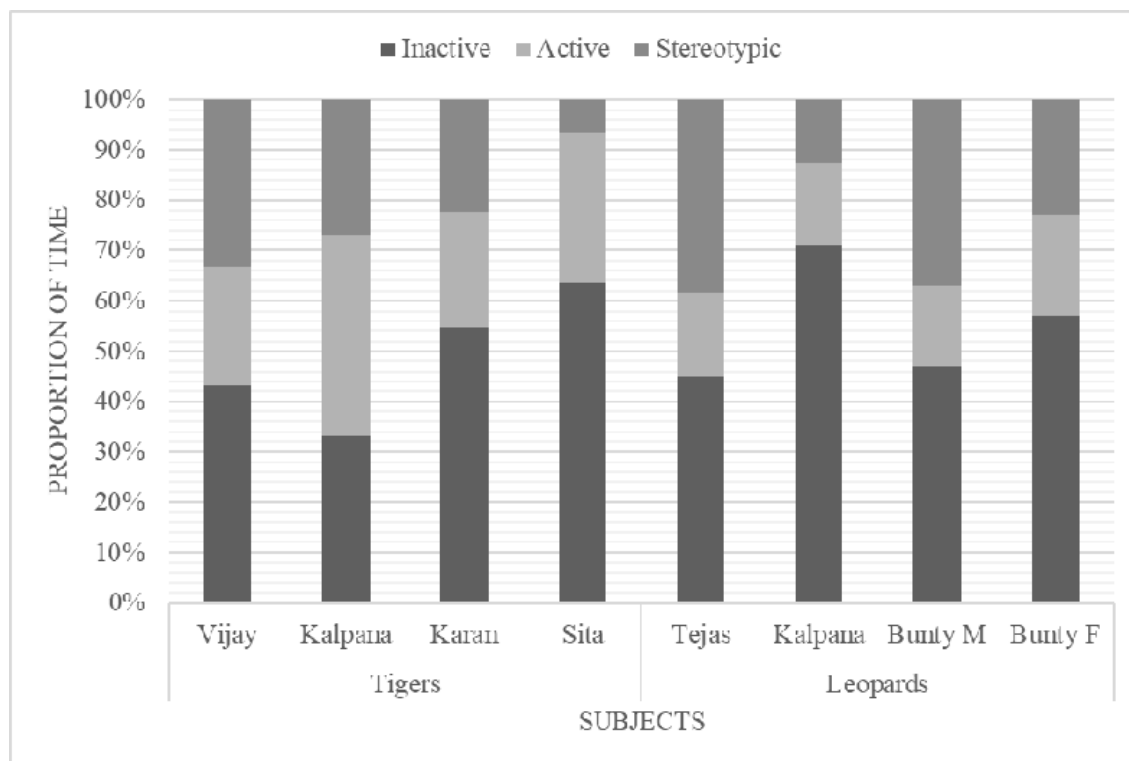

434

435

436

437

438

439

440

441

442

443

444

445 **Table 1**

| Individual                       | Coat Colour | Sex    | Age <sup>†</sup> | Origin               | Rearing History |
|----------------------------------|-------------|--------|------------------|----------------------|-----------------|
| <i>Tiger (Panthera tigris)</i>   |             |        |                  |                      |                 |
| Vijay                            | Mutation    | Male   | 12               | Captive (Delhi zoo)  | Parent          |
| Kalpana                          | Mutation    | Female | 12.4             | Captive (Delhi zoo)  | Parent          |
| Karan                            | Normal      | Male   | 6                | Captive (Mysore zoo) | Parent          |
| Sita                             | Mutation    | Female | 4.3              | Captive (Delhi zoo)  | Unbred          |
| <i>Leopard (Panthera pardus)</i> |             |        |                  |                      |                 |
| Tejas                            | Normal      | Male   | 6.8              | Wild (Uttarakhand)   | -               |
| Babli                            | Normal      | Female | 2.25             | Wild (Jammu)         | -               |
| Bunty                            | Normal      | Male   | 7.9              | Wild (Chhattisgarh)  | -               |
| Bunty                            | Normal      | Female | 8.8              | Wild (Chhattisgarh)  | -               |

446 <sup>†</sup> = as on 30.07.2019

447

448

449

450

451

452

453

454

455

456

457

458

459

460 **Table 2**

|                  | TIGERS |        |       |       |       | LEOPARDS |                    |                    |
|------------------|--------|--------|-------|-------|-------|----------|--------------------|--------------------|
|                  | Vijay  | Kalpna | Karan | Sita  | Tejas | Babli    | Bunty <sub>M</sub> | Bunty <sub>F</sub> |
| LB <sub>i</sub>  | 0      | 0      | 0     | 0     | 0.06  | 0        | 0.06               | 0.65               |
| RA <sub>i</sub>  | 0.45   | 0.65   | 2.6   | 2.47  | 0.26  | 1.04     | 0.26               | 3.06               |
| SI <sub>i</sub>  | 16.4   | 24.6   | 21.8  | 31.18 | 39.45 | 50.97    | 39.97              | 47.58              |
| SL <sub>i</sub>  | 21.1   | 4.16   | 26.04 | 24.15 | 2.41  | 16.86    | 5.53               | 2.08               |
| ST <sub>i</sub>  | 5.4    | 3.9    | 4.3   | 5.8   | 2.93  | 2.08     | 1.3                | 3.58               |
| CL <sub>a</sub>  | 0      | 0      | 0     | 0.45  | 0.71  | 0.12     | 0                  | 0.91               |
| CO <sub>a</sub>  | 8.3    | 13.28  | 10.8  | 3.78  | 0     | 0        | 0                  | 0                  |
| DR <sub>a</sub>  | 2.15   | 3.06   | 0.19  | 1.45  | 0.85  | 0.45     | 0.58               | 0.97               |
| EA <sub>a</sub>  | 1.17   | 8.6    | 0.05  | 6.18  | 2.08  | 4.1      | 1.5                | 2.21               |
| EX <sub>a</sub>  | 0.26   | 0.26   | 0.13  | 0.19  | 0.19  | 0.19     | 0.19               | 0                  |
| GR <sub>a</sub>  | 0.32   | 0.32   | 3.7   | 2.14  | 1.3   | 1.23     | 0                  | 0.71               |
| LI <sub>a</sub>  | 0.59   | 0.59   | 0.13  | 1.82  | 0.19  | 0.52     | 1.17               | 0.32               |
| OL <sub>a</sub>  | 0      | 0      | 0     | 0.05  | 0.06  | 0.13     | 0.85               | 0.13               |
| PL <sub>a</sub>  | 0.13   | 0.13   | 0.26  | 0.05  | 0.26  | 0        | 0.26               | 1.1                |
| RB <sub>a</sub>  | 1.17   | 1.17   | 0     | 0.78  | 0.52  | 0.71     | 0.52               | 1.17               |
| RO <sub>a</sub>  | 0      | 0      | 0     | 0     | 0.45  | 0.52     | 0.45               | 1.56               |
| RU <sub>a</sub>  | 0      | 0      | 0     | 0     | 0.58  | 2.15     | 0                  | 2.08               |
| SC <sub>a</sub>  | 0.06   | 0.06   | 0.05  | 0     | 0     | 0.52     | 0.26               | 0.06               |
| SM <sub>a</sub>  | 4.49   | 4.49   | 1     | 3.32  | 2.41  | 0        | 3.15               | 0.13               |
| VO <sub>a</sub>  | 2.35   | 2.35   | 1.1   | 2.55  | 0.65  | 0.52     | 0.13               | 1.95               |
| WL <sub>a</sub>  | 2.4    | 2.4    | 5.5   | 7     | 6.12  | 5.27     | 6.57               | 6.31               |
| PA <sub>st</sub> | 33.2   | 33.2   | 22.25 | 6.64  | 36.26 | 12.5     | 36.85              | 22.72              |
| SP <sub>st</sub> | 0      | 0      | 0     | 0     | 1.63  | 0        | 0                  | 0                  |
| TS <sub>st</sub> | 0.06   | 0.06   | 0.1   | 0.05  | 0.58  | 0.06     | 0                  | 0.13               |

461 LB, lying on back; RA, resting awake; SI, sitting; SL, sleeping; CL, climbing; CO, cooling; DR,  
 462 drinking; EA, eating; EX, excreting; GR, grooming; LI, licking; PL, playing; RB, rubbing; RO,  
 463 rolling over; RU, running; SC, scratching; SM, scent marking; VO, vocalization; WL, walking; PA,  
 464 pacing; SP, skip pacing; TS, tail/toe sucking; i, inactive behavior; a, active behavior; st, stereotypy

465

466

467 **Table 3**

|          | Pearson Chi-Square of<br>stereotypy w.r.t. | Value | df | Asymptotic<br>Significance | Exact<br>Significance |
|----------|--------------------------------------------|-------|----|----------------------------|-----------------------|
| Tigers   | Gender                                     | 13.17 | 1  | 0.00                       | 0.00                  |
|          | Rearing history                            | 39.51 | 1  | 0.00                       | 0.00                  |
|          | Age                                        | 30.14 | 1  | 0.00                       | 0.00                  |
|          | Enclosure                                  | 0.07  | 1  | 0.79                       | 0.83                  |
| Leopards | Gender                                     | 36.58 | 1  | 0.00                       | 0.00                  |
|          | Age                                        | 0.601 | 1  | 0.21                       | 0.23                  |
|          | Enclosure                                  | 36.58 | 1  | 0.00                       | 0.00                  |

468

469

470

471

472

473

474

475

476

477

478

479

480

481 **Table 4**

|                                                                                                                      |          | B     | S.E. | Wald | df | Significance | Exp (B) | 95% C.I. for Exp (B) |       |
|----------------------------------------------------------------------------------------------------------------------|----------|-------|------|------|----|--------------|---------|----------------------|-------|
|                                                                                                                      |          |       |      |      |    |              |         | Lower                | Upper |
| Tigers                                                                                                               | Density  | 0.01  | 0.01 | 4.26 | 1  | 0.04         | 1.01    | 1.00                 | 1.02  |
|                                                                                                                      | Noise    | 0.04  | 0.03 | 2.61 | 1  | 0.11         | 0.96    | 0.91                 | 1.01  |
|                                                                                                                      | Constant | 1.30  | 1.58 | 0.68 | 1  | 0.41         | 3.66    | -                    | -     |
| R <sup>2</sup> = 0.01 (Cox & Snell), 0.01 (Nagelkerke); Model $\chi^2$ (2) = 4.17, p < 0.05; Significant at p < 0.05 |          |       |      |      |    |              |         |                      |       |
| Leopards                                                                                                             | Density  | 0.03  | 0.02 | 4.70 | 1  | 0.03         | 1.03    | 1.00                 | 1.06  |
|                                                                                                                      | Noise    | 0.02  | 0.03 | 0.30 | 1  | 0.585        | 0.99    | 0.93                 | 1.04  |
|                                                                                                                      | Constant | -0.29 | 1.61 | 0.03 | 1  | 0.86         | 0.75    | -                    | -     |
| R <sup>2</sup> = 0.01 (Cox & Snell), 0.02 (Nagelkerke); Model $\chi^2$ (2) = 8.14, p < 0.05; Significant at p < 0.05 |          |       |      |      |    |              |         |                      |       |

482

483
